# Supplementary material for: Machine Learning-Based Prediction of Mortality and Multidrug-Resistant Infection Risks in ICU Patients with Suspected Infection: A Prospective National Multicenter Cohort StudyAuthor information
Source: Research Square preprint supplement (doi:10.21203/rs.3.rs-7333649/v1), 2025-09-17
Supplement: Supplementary file 1 [file 833b5aec72825f3f4af12a93.docx]

**Table S1 Baseline of patients within suspected infection**

| Variables | n=2963 |
| --- | --- |
| Age, mean±SD, year | 64.34±15.99 |
| Female, n(%) | 1029(34.73) |
| APACHE Ⅱ* | 15.75±4.39 |
| Length of ICU stay, mean±SD, day | 19.03±29.30 |
| Region, n(%) |  |
| North China | 779(26.29) |
| East China | 811(27.37) |
| Central China | 562(18.97) |
| Southwest China | 558(18.83) |
| South China | 118(3.98) |
| Northwest China | 104(3.51) |
| Northeast China | 31(1.05) |
| Hospital grades, n(%) |  |
| Grade ⅢA | 2563(86.50) |
| Grade ⅢB | 119(4.01) |
| Grade ⅢC | 59(2.00) |
| Grade ⅡA | 222(7.49) |
| Infections, n(%) |  |
| Pneumonia | 2349(79.28) |
| Bloodstream infections | 507(17.11) |
| Intro-abdominal infections | 490(16.54) |
| Urinary infections | 250(8.44) |
| Skin infections | 65(2.19) |
| Central system infections | 75(2.53) |
| Pelvic infections | 13(0.44) |
| Drug resistance | 825(27.84) |
| Multidrug resistance | 535(18.06) |
| Microbiological data, n(%) |  |
| Klebsiella pneumoniae | 314(10.60) |
| Baumanii | 255(8.61) |
| Pseudomonas aeruginosa | 174(5.87) |
| Escherichia coli | 132(4.45) |
| Staphylococcus aureus | 72(2.43) |
| Stenotrophomonas maltophilia | 43(1.45) |
| Enterococcus faecium | 42(1.42) |
| Staphylococcus epidermidis | 32(1.08) |
| enterobacter cloacae | 25(0.84) |
| Candida albicans | 119(4.01) |
| Aspergillus | 29(0.97) |
| Candida glabrata | 26(0.88) |
| Mortality, n(%) | 323(10.90) |

*APACHE: Acute Physiology and Chronic Health Evaluation

Table S2 Risk factors of mortality for patients with infection when they admitted to ICU

| Variables | OR (95%CI) | *P* value |
| --- | --- | --- |
| APACHE Ⅱ | 1.51(1.44-1.58) | <0.01 |
| Surgery | 2.39(1.60-3.56) | <0.01 |
| Bloodstream infections | 2.08(1.40-3.10) | 0.02 |

Table S3. Risk factors of multidrug resistance for patients with infection when they admitted to ICU

| Variables | OR (95%CI) | *P* value |
| --- | --- | --- |
| APACHEⅡ | 1.06(1.03-1.09) | <0.01 |
| Bloodstream infections | 1.82(1.26-2.61) | <0.01 |
| Urinary infections | 3.42(2.20-5.30) | <0.01 |
| Klebsiella pneumoniae | 11.67(7.91-17.21) | <0.01 |
| Acinetobacter baumanii | 85.22(50.03-145.18) | <0.01 |
| Enterococcus faecium | 22.18(8.58-56.93) | <0.01 |

Figure S1 Hospitals in different regions of mainland China in this study

Figure S2 Hospital classification of mainland China in this study

Figure S3 Infections data

Figure S4 Microbiological data
